# Supplementary material for: Staufen Negatively Modulates MicroRNA Activity in Caenorhabditis elegans
Source: PubMed Central journal article supplement (PMC4856075; doi:10.1534/g3.116.027300), 2016-02-23
Supplement: supp_g3.116.027300_TableS11.pdf [file supp_g3.116.027300_TableS11.pdf]

**Table S11.** *C. elegans* strains used in this study

| Name   | Genotype                                                                                                        |
|--------|-----------------------------------------------------------------------------------------------------------------|
| JK4608 | <i>stau-1(q798)</i> X                                                                                           |
| JR667  | <i>unc-119(e2498:Tc1)</i> III; <i>wls51</i> [ <i>scm::gfp</i> + <i>unc-119(+)</i> ] V (wild type <sup>§</sup> ) |
| N2     | wild type                                                                                                       |
| OH3646 | <i>otls114</i> ; <i>lsy-6(ot150)</i> V                                                                          |
| VT573  | <i>lin-4(e912)</i> II; <i>lin-14(n179)</i> X                                                                    |
| VT1296 | <i>mir-48 mir-241(nDf51) mals105</i> V                                                                          |
| VT1367 | <i>mals105</i> [ <i>col-19::gfp</i> ] V (wild type <sup>§</sup> )                                               |
| VT2361 | <i>otls114</i> [ <i>lim-6::gfp</i> + <i>rol-6(su1006)</i> ]                                                     |
| VT2485 | <i>wls51</i> V; <i>lin-14(n355n679)</i> X                                                                       |
| VT2692 | <i>let-7(n2853)</i> X; <i>mals105</i> V                                                                         |
| VT2700 | <i>dcr-1(bp132)</i> III; <i>wls51</i> V                                                                         |
| VT2856 | <i>mals105</i> [ <i>col-19::gfp</i> ] V; <i>stau-1(tm2266)</i> X                                                |
| VT2857 | <i>mir-48 mir-241(nDf51) mals105</i> V; <i>stau-1(tm2266)</i> X                                                 |
| VT2858 | <i>otls114</i> ; <i>stau-1(tm2266)</i> X                                                                        |
| VT2859 | <i>otls114</i> ; <i>lsy-6(ot150)</i> V; <i>stau-1(tm2266)</i> X                                                 |
| VT2862 | <i>lin-4(e912)</i> II; <i>lin-14(n179)</i> <i>stau-1(tm2266)</i> X                                              |
| VT2870 | <i>stau-1(tm2266)</i> X (4xbackcross)                                                                           |
| VT2876 | <i>dcr-1(bp132)</i> III; <i>wls51</i> V; <i>stau-1(tm2266)</i> X                                                |
| VT2877 | <i>mir-48 mir-241(nDf51) mals105</i> V; <i>stau-1(q798)</i> X                                                   |
| VT2878 | <i>wls51</i> V; <i>lin-14(n355n679)</i> <i>stau-1(tm2266)</i> X                                                 |
| VT2938 | <i>mir-48 mir-241(nDf51) mals105</i> V; <i>eri-1(mg366)</i> IV                                                  |
| VT3314 | <i>let-7(n2853)</i> <i>stau-1(tm2266)</i> X; <i>mals105</i> V                                                   |
| VT3354 | <i>stau-1(ma327)</i> X (2xbackcross)                                                                            |
| VT3358 | <i>mir-48 mir-241(nDf51) mals105</i> V; <i>stau-1(ma327)</i> X                                                  |
| VT3405 | <i>stau-1(ma346)</i> X (3xbackcross)                                                                            |
| VT3406 | <i>mir-48 mir-241(nDf51) mals105</i> V; <i>stau-1(ma346)</i> X                                                  |
| VT3407 | <i>wls51</i> V; <i>stau-1(ma327)</i> X                                                                          |
| VT3408 | <i>wls51</i> V; <i>stau-1(ma346)</i> X                                                                          |

<sup>§</sup> These strains were used as wild type in heterochronic phenotype assays.
